# Supplementary material for: Chromosomal Microarray Analysis as a First-Tier Clinical Diagnostic Test in Patients With Developmental Delay/Intellectual Disability, Autism Spectrum Disorders, and Multiple Congenital Anomalies: A Prospective Multicenter Study in Korea
Source: PubMed Central journal article supplement — Ann Lab Med. 2019 Jan 10;39(3):299–310. doi: 10.3343/alm.2019.39.3.299 (PMC6340852; doi:10.3343/alm.2019.39.3.299), 2019-01-10
Supplement: alm-39-299-s001.pdf [file alm-39-299-s001.pdf]

**Supplemental Data Table S1.** Size distribution of CNVs found in patients

| Size (Mb) | Number of CNVs (%)                   |                      |                      |
|-----------|--------------------------------------|----------------------|----------------------|
|           | Number of pathogenic variants (N=65) | Number of VPS (N=67) | Number of VUS (N=58) |
| <0.5      | 4 (6.2)                              | 1 (1.5)              | 23 (39.7)            |
| 0.5–1     | 6 (9.2)                              | 8 (11.9)             | 16 (27.6)            |
| 1–5       | 35 (53.8)                            | 22 (32.8)            | 18 (31.0)            |
| 5–10      | 9 (13.8)                             | 20 (29.9)            | 1 (1.7)              |
| >10       | 11 (17.0)                            | 16 (23.9)            | 0 (0.0)              |

Abbreviations: CNV, copy number variation; VPS, variants of possible significance; VUS, variants of unknown significance.
