# Supplementary material for: Chromosomal Microarray Analysis as a First-Tier Clinical Diagnostic Test in Patients With Developmental Delay/Intellectual Disability, Autism Spectrum Disorders, and Multiple Congenital Anomalies: A Prospective Multicenter Study in Korea
Source: PubMed Central journal article supplement — Ann Lab Med. 2019 Jan 10;39(3):299–310. doi: 10.3343/alm.2019.39.3.299 (PMC6340852; doi:10.3343/alm.2019.39.3.299), 2019-01-10
Supplement: alm-39-299-s002.pdf [file alm-39-299-s002.pdf]

**Supplemental Data Table S2.** Demographic and clinical features of patients according to CMA results

|                                                           | Total<br>N (%) | Pathogenic<br>N (%) | VPS<br>N (%) | VUS<br>N (%) | Benign<br>N (%) |
|-----------------------------------------------------------|----------------|---------------------|--------------|--------------|-----------------|
| <b>Gender</b>                                             |                |                     |              |              |                 |
| Male                                                      | 372/617 (60.3) | 34/65 (52.3)        | 33/57 (57.9) | 23/51 (45.1) | 282/444 (63.5)  |
| Female                                                    | 245/617 (39.7) | 31/65 (47.7)        | 24/57 (42.1) | 28/51 (54.9) | 162/444 (36.5)  |
| <b>Age (yr)</b>                                           |                |                     |              |              |                 |
| <2                                                        | 218/617 (35.3) | 22/65 (33.8)        | 25/57 (43.9) | 20/51 (39.2) | 151/444 (34.0)  |
| 2–5                                                       | 254/617 (41.2) | 29/65 (44.6)        | 18/57 (31.6) | 17/51 (33.3) | 190/444 (42.8)  |
| 5–10                                                      | 66/617 (10.7)  | 7/65 (10.8)         | 4/57 (7.0)   | 6/51 (11.8)  | 49/444 (11.0)   |
| >10                                                       | 79/617 (12.8)  | 7/65 (10.8)         | 10/57 (17.5) | 8/51 (15.7)  | 54/444 (12.2)   |
| <b>Clinical features</b>                                  |                |                     |              |              |                 |
| Neurodevelopmental disorder                               | 561/589 (95.2) | 59/61 (96.7)        | 57/57 (100)  | 47/48 (97.9) | 398/423 (94.1)  |
| Developmental delay                                       | 536/588 (91.2) | 56/61 (91.8)        | 57/57 (98.2) | 45/48 (93.8) | 378/422 (89.6)  |
| Learning disability or behavioral or psychiatric disorder | 390/535 (72.9) | 44/57 (77.2)        | 42/51 (82.4) | 33/45 (73.3) | 271/382 (70.9)  |
| Seizures                                                  | 98/584 (16.8)  | 9/61 (14.8)         | 12/56 (21.4) | 8/47 (17.0)  | 69/420 (16.4)   |
| Intellectual disability                                   | 372/542 (68.6) | 42/57 (73.7)        | 43/53 (81.1) | 31/45 (68.9) | 256/387 (66.1)  |
| Speech delay                                              | 435/553 (78.7) | 49/60 (81.7)        | 48/54 (88.9) | 37/47 (78.7) | 301/392 (76.8)  |
| Autism spectrum disorder                                  | 95/549 (17.3)  | 12/58 (20.7)        | 8/55 (14.5)  | 10/46 (21.7) | 65/390 (16.7)   |
| Congenital anomalies                                      | 97/580 (16.7)  | 9/58 (15.5)         | 11/57 (19.3) | 7/48 (14.6)  | 71/418 (17.0)   |
| Isolated anomaly                                          | 52/580 (9.0)   | 8/58 (13.8)         | 5/57 (8.8)   | 2/48 (4.2)   | 38/418 (9.1)    |
| Multiple anomalies                                        | 45/580 (7.8)   | 1/58 (1.7)          | 6/57 (10.5)  | 5/48 (10.4)  | 33/418 (7.9)    |
| Dysmorphic features                                       | 107/580 (18.4) | 17/59 (28.8)        | 19/57 (33.3) | 10/47 (21.3) | 61/417 (14.6)   |
| Abnormal growth                                           | 82/563 (14.6)  | 9/60 (15.0)         | 9/56 (16.1)  | 6/46 (13.0)  | 58/401 (14.5)   |
| Failure to thrive                                         | 66/562 (11.7)  | 6/60 (10.0)         | 7/56 (12.5)  | 5/46 (10.9)  | 48/400 (12.0)   |
| Short stature                                             | 37/529 (7.0)   | 4/58 (6.9)          | 4/53 (7.5)   | 3/45 (6.7)   | 26/373 (7.0)    |
| Hypotonia                                                 | 136/584 (23.3) | 19/61 (31.1)        | 21/57 (36.8) | 9/48 (18.8)  | 87/418 (20.8)   |

Abbreviations: CMA, chromosomal microarray analysis; VPS, variants of possible significance; VUS, variants of unknown significance.
