# Supplementary material for: Chromosomal Microarray Analysis as a First-Tier Clinical Diagnostic Test in Patients With Developmental Delay/Intellectual Disability, Autism Spectrum Disorders, and Multiple Congenital Anomalies: A Prospective Multicenter Study in Korea
Source: PubMed Central journal article supplement — Ann Lab Med. 2019 Jan 10;39(3):299–310. doi: 10.3343/alm.2019.39.3.299 (PMC6340852; doi:10.3343/alm.2019.39.3.299), 2019-01-10
Supplement: alm-39-299-s003.pdf [file alm-39-299-s003.pdf]

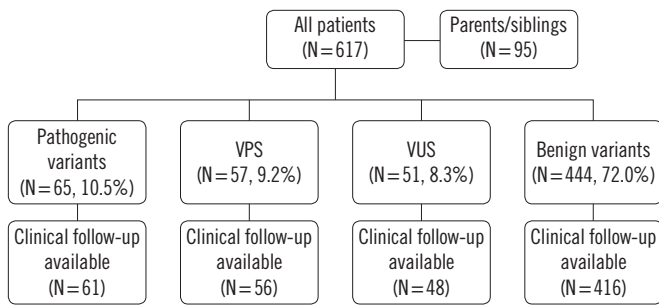

**Supplemental Data Fig. S1.** Overview of patient enrollment, chromosomal microarray analysis results, and clinical follow-up.

Abbreviations: VPS, variants of possible significance; VUS, variants of unknown significance.
