# Supplementary material for: Chromosomal Microarray Analysis as a First-Tier Clinical Diagnostic Test in Patients With Developmental Delay/Intellectual Disability, Autism Spectrum Disorders, and Multiple Congenital Anomalies: A Prospective Multicenter Study in Korea
Source: PubMed Central journal article supplement — Ann Lab Med. 2019 Jan 10;39(3):299–310. doi: 10.3343/alm.2019.39.3.299 (PMC6340852; doi:10.3343/alm.2019.39.3.299), 2019-01-10
Supplement: alm-39-299-s004.pdf [file alm-39-299-s004.pdf]

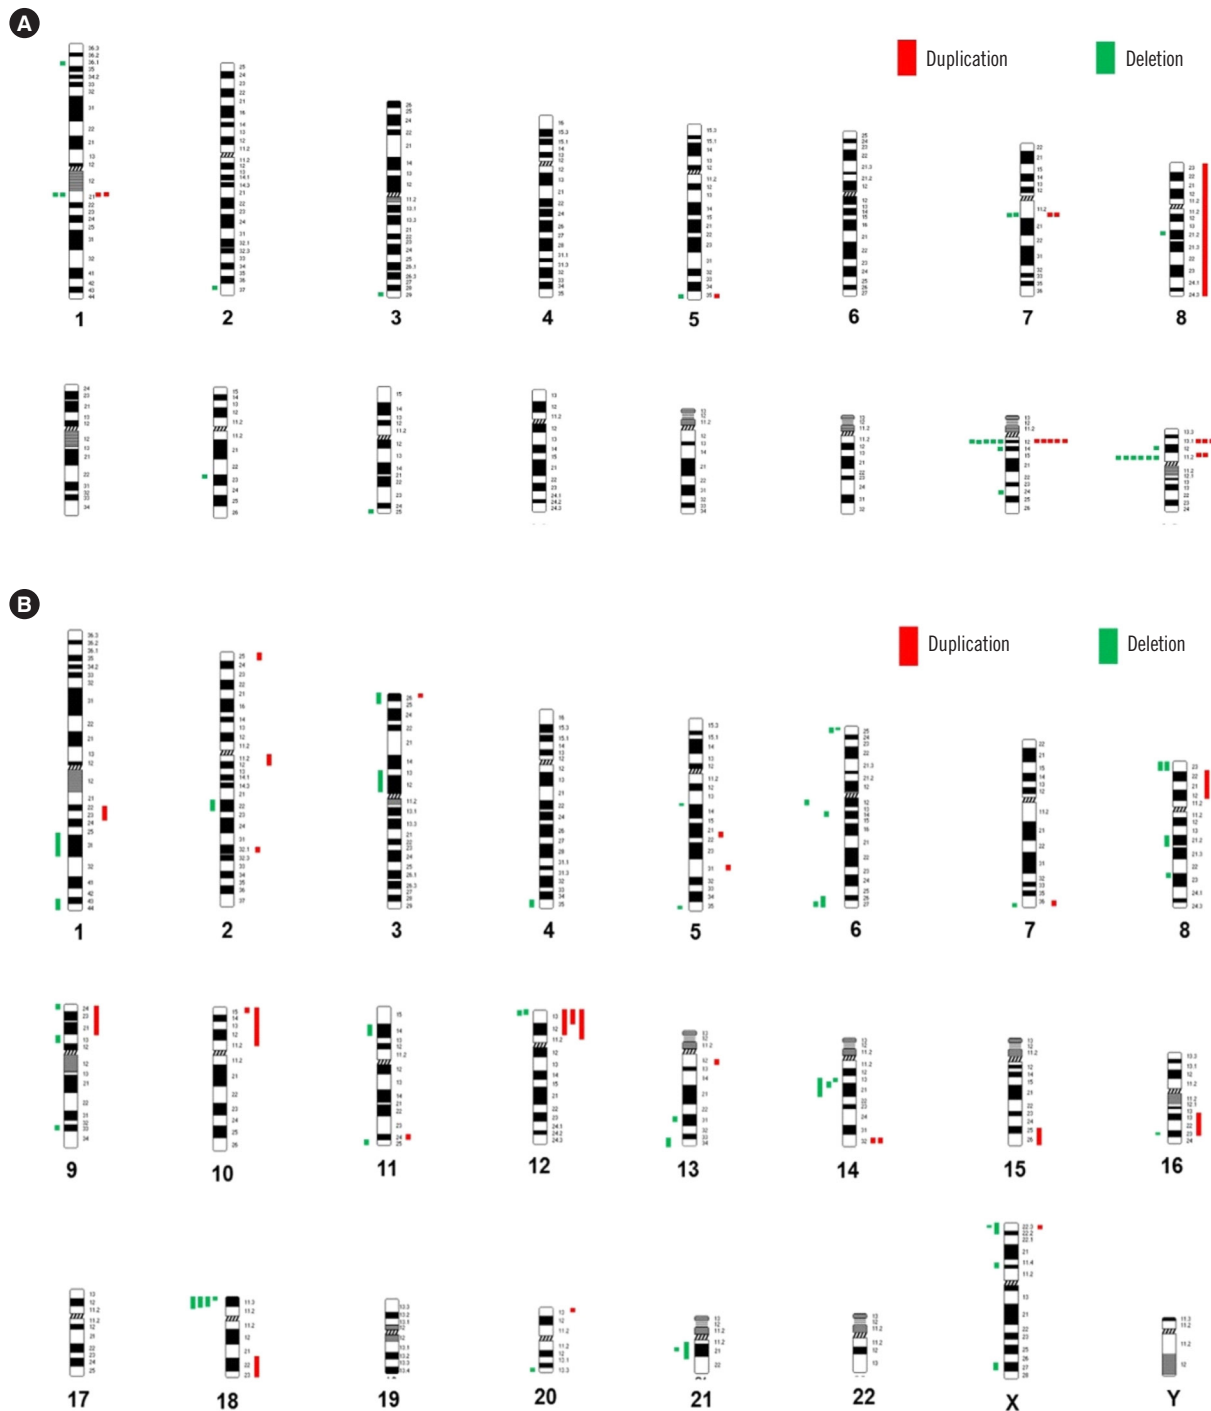

**Supplemental Data Fig. S2.** Regions of chromosomal duplication and deletion in patients with (A) pathogenic variants and (B) VPS. Red bars indicate specific regions of duplication, and green bars indicate deletion of chromosomes for each patient. Abbreviation: VPS, Variants of possible significance.
